# Supplementary material for: Squamata reptiles as a potential source of helminth infections when preyed on by companion animals
Source: Springer Nature journal article supplement (doi:10.1186/s13071-023-05852-8), 2023-07-14
Supplement: MOESM1 [file 13071_2023_5852_MOESM1_ESM.pdf]

**Main morphological features used for macroscopic diagnosis of each parasite taxa**

**Fig. S1** Larval stage of *Sphaerirostris picae*.

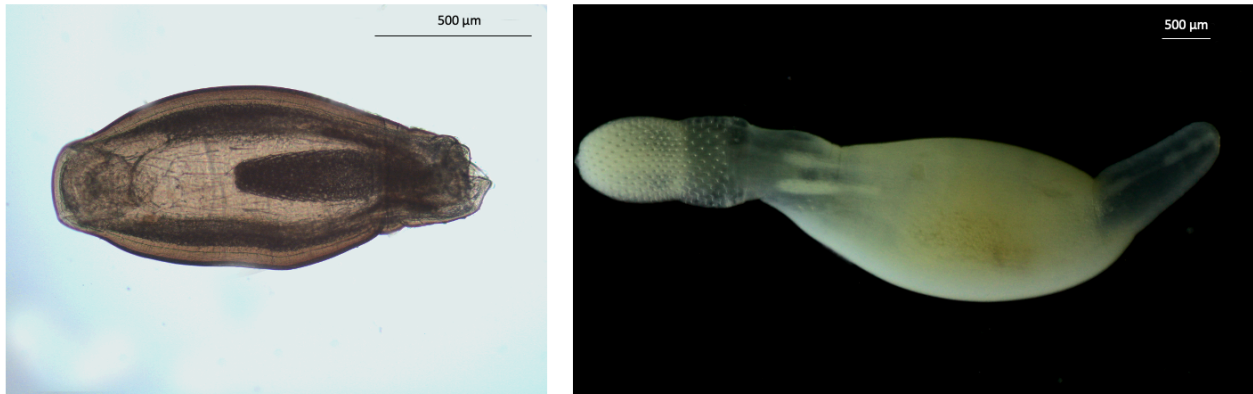

Fusiform and whitish cysts containing a cystacanth with trunk cylindrical, spindle shaped, gradually tapering toward both ends; proboscis provided with hook rows and separated in two parts by a constriction. Anterior proboscis ovoid, with hook length increasing apically. Posterior proboscis cylindrical with more widely spaced armature. Neck short and lemnisci visible (Table S1a) [48].

**Fig. S2** Larval stage of *Macracanthorhynchus hirudinaceus*.

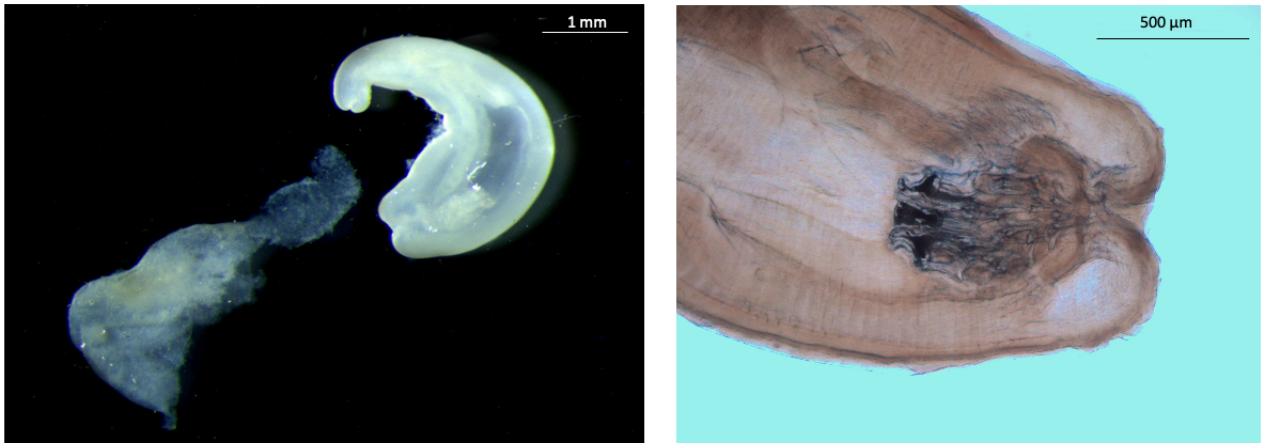

Spherical cyst containing a cystacanth provided with thick wall and cylindrical proboscis bearing hooks in circular rows. Length of hooks increasing apically, with the longest one measuring 276.5 μm (Table S1a) [38, 44, 52].

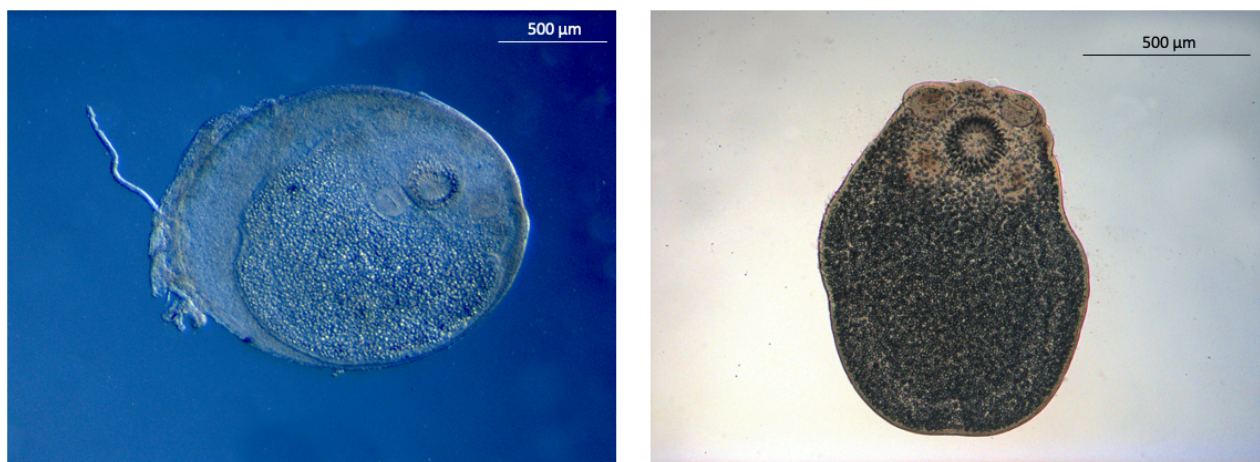

**Fig. S3** Larval stage of *Diplopylidium acanthotetra*.

Single, multiple (in clusters) or merging cysts of spherical shape. Cysticercoid characterized by numerous calcareous corpuscles and circular

rostellum, armed with hooks arranged in four circles (Table S1b) [29, 36, 39, 53].

**Fig. S4** Larval stage of *Joyeuxiella echinorhyncoides*.

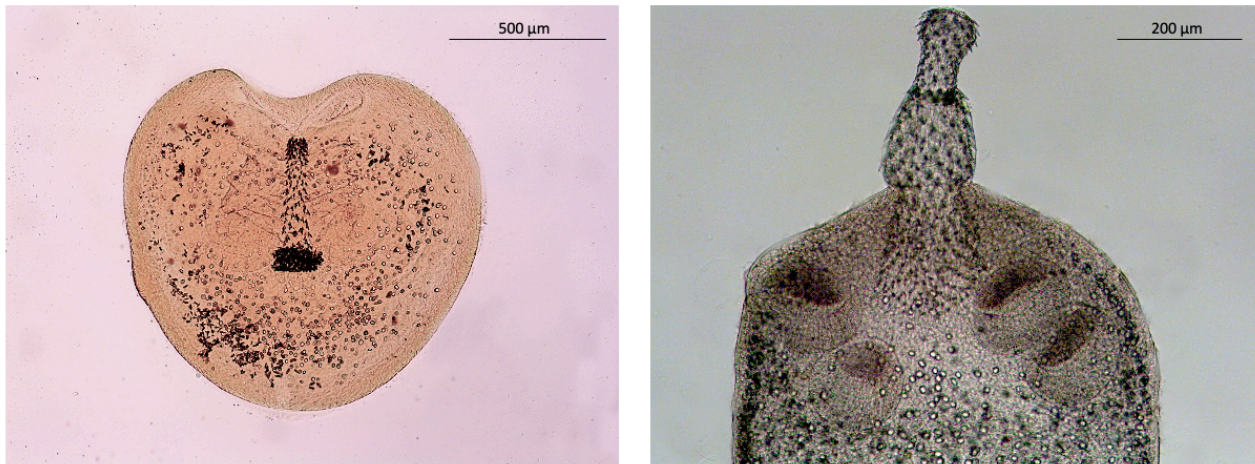

Single, multiple or merging cysts of spherical shape, containing a cysticercoid (more than one in case of merging cysts) heart-shaped characterized by tubular rostellum armed with hooks over the entire length, including the base invaginated (Table S1b) [29, 41].

**Fig. S5** Larval stage of *Joyeuxiella pasqualei*.

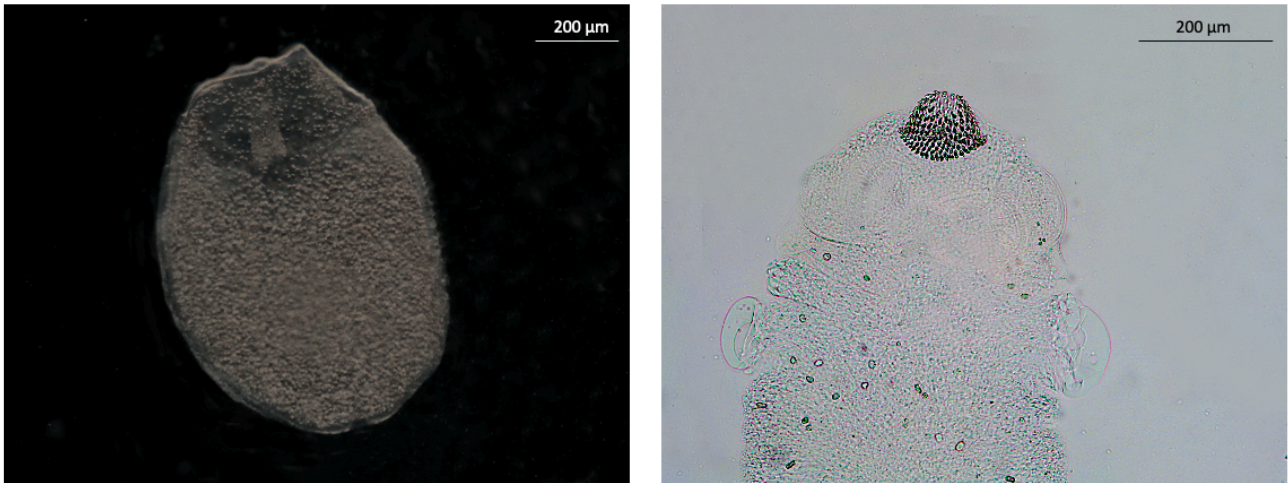

Spherical cyst containing a cysticercoid characterized by conical rostellum, armed with several alternating circles of thorn-shaped hooks (Table S1b) [29, 41, 54].

**Fig. S6** Larval stage of *Mesocestoides lineatus*.

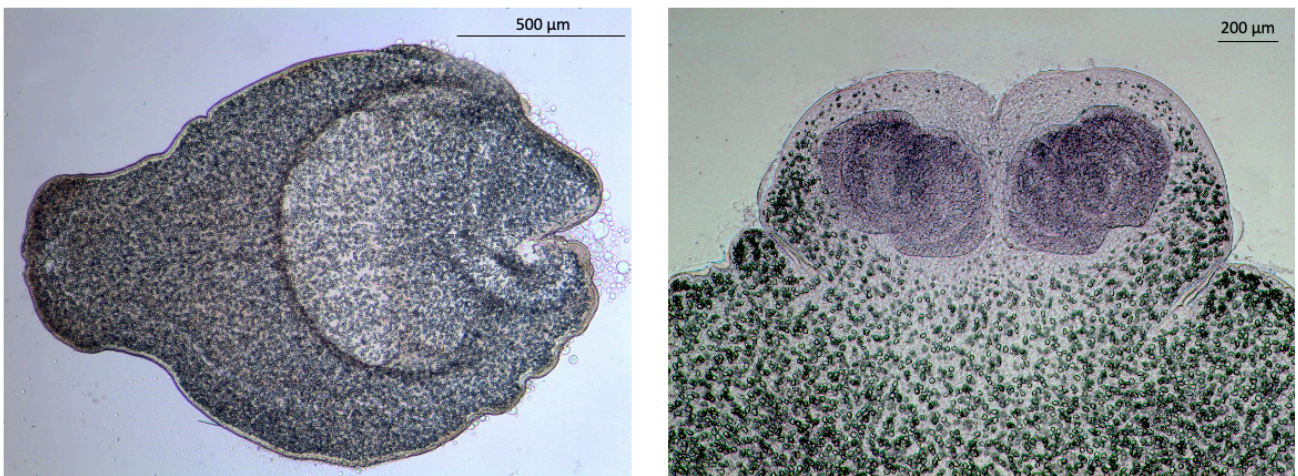

Single or multiple spherical cysts containing a flattened and non-segmented tetrathynidium of pleomorphic shape (mostly longitudinally elongated),

characterized by lacking rostellum and the presence of four visible suckers (Table S1b) [16, 46, 50].

**Fig. S7** Adult of *Paradistomum mutabile*.

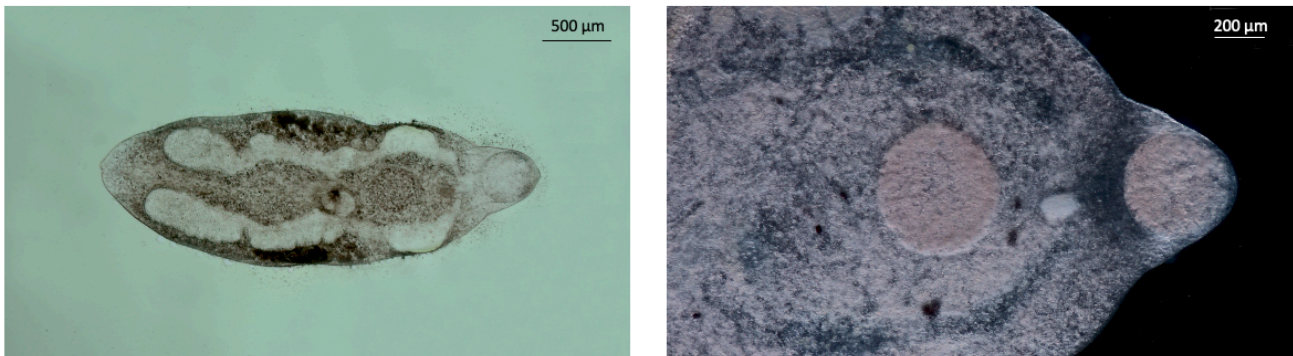

Adult digenea (4854-2525 x 2304-831µm, based on four specimens) characterized by clearly visible oral (412-260 µm wide) and ventral (602-274 µm wide) suckers, branched tubular uterus containing eggs of 52-45 µm length, a pair of branched vitellogen glands and intestinal caeca extend into posterior quarter of the body [37, 43].

**Fig. S8** Nematode larval stage of the Family *Acuariidae*.

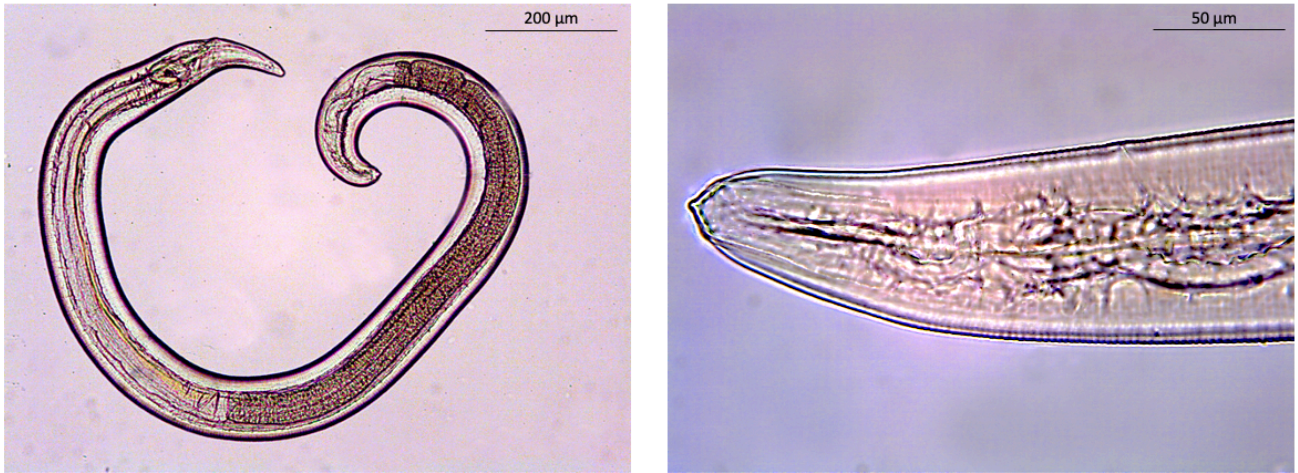

Spherical cyst containing a third-stage larvae spiralized, characterized by cephalic region with triangular lips and lateral cordons extending from the anterior end (Table S1c) [51].

**Fig. S9** Larval stage of *Physaloptera* sp..

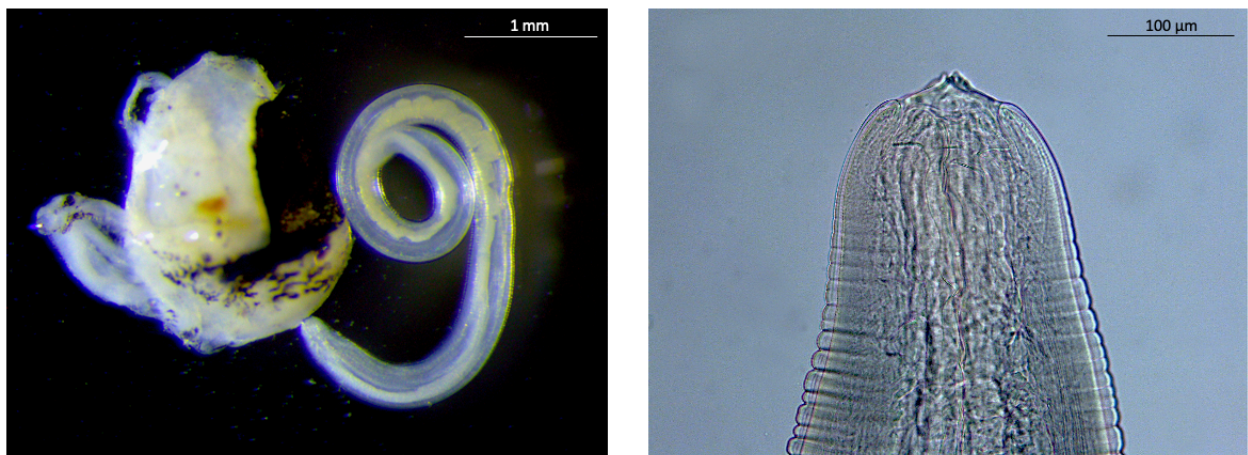

Spherical cyst containing a spiralized third-stage larvae characterized by thin and smooth cuticle and long muscular-glandular oesophagus. The

cephalic region presents a collarete and the rounded anterior end consists of two well-developed lateral pseudolabia (Table S1c) [55].

**Fig. S10** Adult of *Parapharyngodon micipsae*.

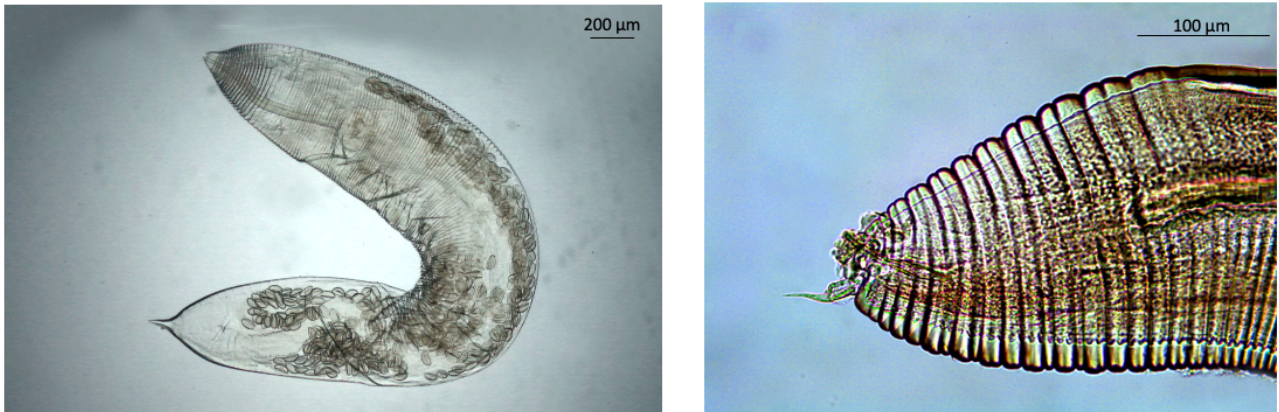

General - Small nematode, light-colored, fusiform and cuticle with distinct transverse striations.

Male - Body truncated posteriorly with lateral alae well developed. Three pairs of cloacal papillae and one on the tail. Spicule well sclerotized, sharp at the end.

Female - Body with cuticle annulations, anterior end bluntly pointed, posterior end tapered to fine spike. Oesophageal isthmus long and wide, as well as the bulbus (Table S1d) [40, 47, 56].

**Fig. S11** Adult of *Moaciria icosiensis*.

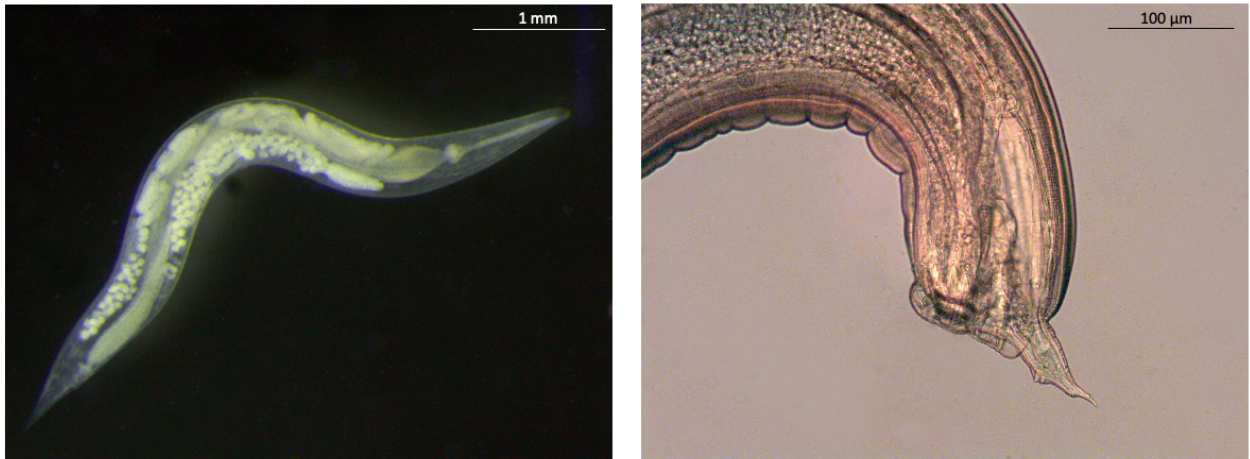

General - Small nematode with oesophagus divisible into anterior pharynx, corpus and posterior valved bulb.

Male - Body with a pair of equal spicules, characterized by proximal end truncate and distal tapered, ending in a sharp tip. Gubernaculum of arrow shape and well-developed

Female - Body stout characterized by thick cuticle and fine transverse striations. Vulva provided with minute vulvar lips, slightly protruding, just anterior to mid-length of body. Amphidelphic uterus. Tail thin and tapering to a fine point. Eggs numerous and smooth-shelled (Table S1e) [45, 56].

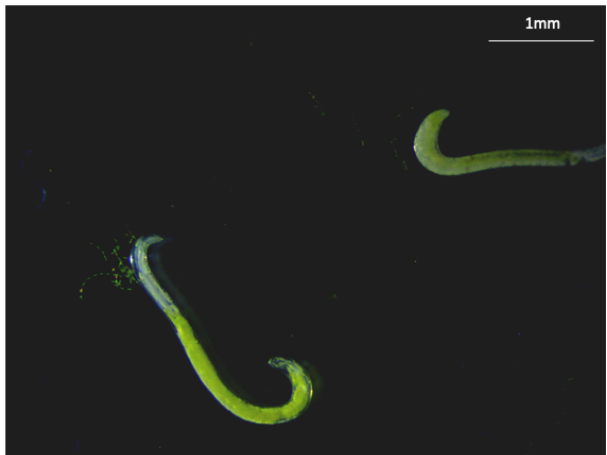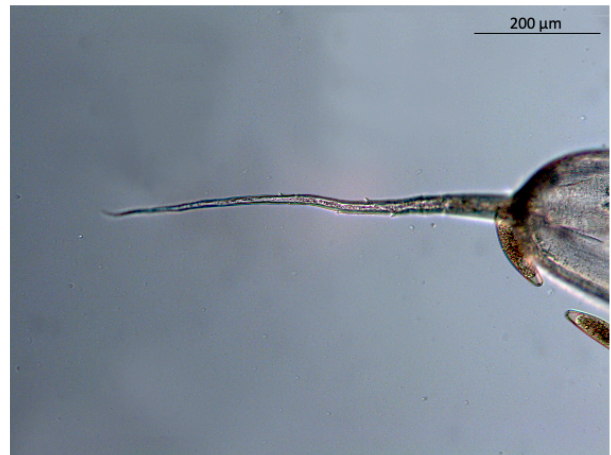

**Fig. S12** Adult of *Spauligodon aloisei*.

General - Small nematode of fusiform shape. Body with cuticle fine cross-striations and filiform tail with spines.

Female (single gender recorded) - Body (6500-5400 μm, based on two specimens) tapering anteriorly and posteriorly cylindrical. Esophagus (including bulb) length of 480-420μm; eggs (130-110μm) with truncated ends and tail length of 650-630 μm [42, 56].

**Table S1** Morphometric measurements (L: length; W: width) of helminths collected from reptiles (all measurements are given in micrometer).

**1a)** Acanthocephalan larval

stages.

| <b>Species (n)</b>               | <b>Cyst (L x W)</b>    | <b>Cystacanth (L x W)</b> | <b>Proboscis (L)</b> |
|----------------------------------|------------------------|---------------------------|----------------------|
| <i>S. picae</i> (11)             | 2450-1064 x<br>940-508 | 2122-1239 x 823-480       | 809-520              |
| <i>M.</i><br><i>hirudinaceus</i> | 2205 x 1703            | 4180 x 2384               | 700                  |
| (1)                              |                        |                           |                      |

**1b)** Cestode larval stages.

| <b>Species (n)</b>                | <b>Cyst (L x W)</b>       | <b>Cysticercoid (L x W)</b> | <b>Rostellum (W)</b> | <b>Rostellum (L)</b> |
|-----------------------------------|---------------------------|-----------------------------|----------------------|----------------------|
| <i>D. acanthotetra</i><br>(8)     | 2749-1200 x 2368-<br>1500 | 2600-936 x 1924-<br>803     | 346-182              | -                    |
| <i>J. echinorhyncoides</i><br>(7) | 2300-1053 x 1600-<br>1019 | 1700-810 x 988-603          | -                    | 503-286              |
| <i>J. pasqualei</i> (6)           | 2000-800 x 1450-<br>900   | 2300-780 x 1340-<br>703     | -                    | 180-110              |
| <i>M. lineatus</i> (5)            | 791-523 x 615-431         | 1619-1150 x 1345-<br>848    | -                    | -                    |

**1c)** Nematode third-stage larvae (total body length: TBL; muscular oesophagus length: MOL; glandular oesophagus length: GOL; tail length: TL).

| <b>Genera (n)</b>              | <b>Cyst (L x W)</b>      | <b>TBL</b> | <b>MOL</b> | <b>GOL</b> | <b>TL</b> |
|--------------------------------|--------------------------|------------|------------|------------|-----------|
| Acuariidae<br>specimens (5)    | 1200-451 x 581-<br>486   | 2717-2100  | 355-200    | 1200-800   | 120-101   |
| <i>Physaloptera</i><br>sp. (4) | 3500-2000 x<br>3340-1600 | 8800-7266  | 383-280    | 2300-1900  | 230-190   |

**1d)** Adult nematode *Parapharyngodon micipsae* (total body length: TBL; oesophagus + bulbus length: OBL; spicule length: SL; anus-tail length: ATL; egg length: EL)

| <b>Genders (n)</b> | <b>TBL</b> | <b>OBL</b> | <b>SL</b> | <b>ATL</b> | <b>EL</b> |
|--------------------|------------|------------|-----------|------------|-----------|
|--------------------|------------|------------|-----------|------------|-----------|

|             |           |           |       |         |       |
|-------------|-----------|-----------|-------|---------|-------|
| Males (2)   | 2931-1630 | 658-390   | 80-60 | -       | -     |
| Females (2) | 4700-4500 | 1216-1193 | -     | 500-414 | 89-80 |

**1e)** Adult nematode *Moaciria icosiensis* (total body length: TBL; oesophagus + bulbus length: OBL; spicule length: SL; anus-tail length: ATL; egg length: EL)

| <b>Genders (n)</b> | <b>TBL</b> | <b>OBL</b> | <b>SL</b> | <b>ATL</b> | <b>EL</b> |
|--------------------|------------|------------|-----------|------------|-----------|
| Males (4)          | 4500-4178  | 955-777    | 315-290   | -          | -         |
| Females (1)        | 5600       | 900        | -         | 550        | 63-87     |
