# Supplementary material for: Squamata reptiles as a potential source of helminth infections when preyed on by companion animals
Source: Springer Nature journal article supplement (doi:10.1186/s13071-023-05852-8), 2023-07-14
Supplement: MOESM2 [file 13071_2023_5852_MOESM2_ESM.pdf]

**Table S2** Eigenvectors of variables associated to dimension 1 and 2 of the multiple correspondence analysis.

| <b>Factors</b>              | <b>Category</b>            | <b>Dimension 1</b> | <b>Dimension 2</b> | <b>Dimension 3</b> |
|-----------------------------|----------------------------|--------------------|--------------------|--------------------|
| Captured dead or alive      | alive                      | -0,0209            | -0,092             | -0,0338            |
| Captured dead or alive      | dead                       | 0,3203             | 1,417              | 0,5188             |
| Region                      | Apulia                     | 0,5319             | 0,18               | -0,0671            |
| Region                      | Basilicata                 | 0,7378             | -0,04              | -0,0392            |
| Region                      | Calabria                   | 0,6194             | -0,374             | 0,5716             |
| Region                      | Sicily                     | -0,8016            | -0,101             | -0,0592            |
| Characteristics of the area | dog shelter                | 0,6855             | -0,151             | 0,1586             |
| Characteristics of the area | household                  | 0,5465             | -0,015             | -0,1741            |
| Characteristics of the area | Peri urban                 | 0,4117             | 0,004              | -0,2692            |
| Characteristics of the area | regional park              | 0,8472             | -0,055             | 0,0379             |
| Characteristics of the area | Rural                      | -0,3557            | 0,106              | -0,8102            |
| Characteristics of the area | urban                      | -0,8297            | 0,109              | 0,0717             |
| Presence of pets            | no pets                    | 0,6066             | -0,023             | -0,1317            |
| Presence of pets            | pets                       | -0,0258            | 0,001              | 0,0056             |
| Insecticides/repellents     | insecticides/repellents    | 0,6676             | -0,131             | 0,1096             |
| Insecticides/repellents     | no insecticides/repellents | -0,3483            | 0,068              | -0,0572            |
| Anthelmintics               | anthelmintics              | 0,5465             | -0,015             | -0,1741            |
| Anthelmintics               | no anthelmintics           | -0,0281            | 0,001              | 0,009              |
| Cysts                       | cysts                      | 0,3665             | 0,103              | -0,1351            |
| Cysts                       | no cysts                   | -0,2658            | -0,075             | 0,098              |
| Acanthocephala              | Acanthocephala             | 0,3845             | -0,038             | -0,1489            |
| Acanthocephala              | no Acanthocephala          | -0,0578            | 0,006              | 0,0224             |

---

|          |             |         |        |         |
|----------|-------------|---------|--------|---------|
| Nematoda | Nematoda    | -0,3272 | 0,147  | 0,0302  |
| Nematoda | no Nematoda | 0,0372  | -0,017 | -0,0034 |
| Cestoda  | Cestoda     | 0,4511  | 0,206  | -0,1396 |
| Cestoda  | no Cestoda  | -0,0653 | -0,03  | 0,0202  |
| Digenea  | Digenea     | 0,2931  | -0,048 | -0,1185 |
| Digenea  | no Digenea  | -0,0112 | 0,002  | 0,0045  |

---
